# Supplementary material for: CLEC5A is critical in Pseudomonas aeruginosa–induced NET formation and acute lung injury
Source: PubMed Central journal article supplement (PMC9676025; doi:10.1172/jci.insight.156613), 2022-09-22
Supplement: jciinsight-7-156613-s008.pdf [file jciinsight-7-156613-s008.pdf]

Figure S1.

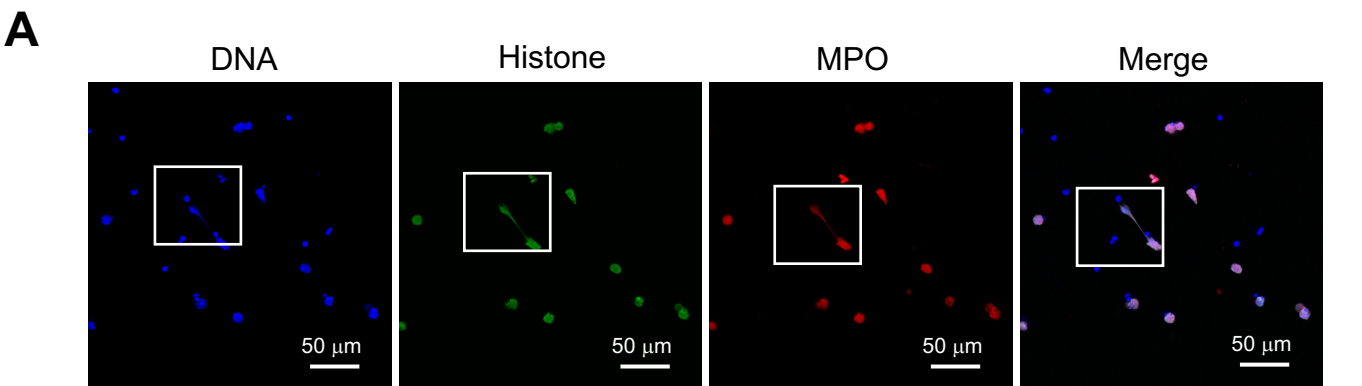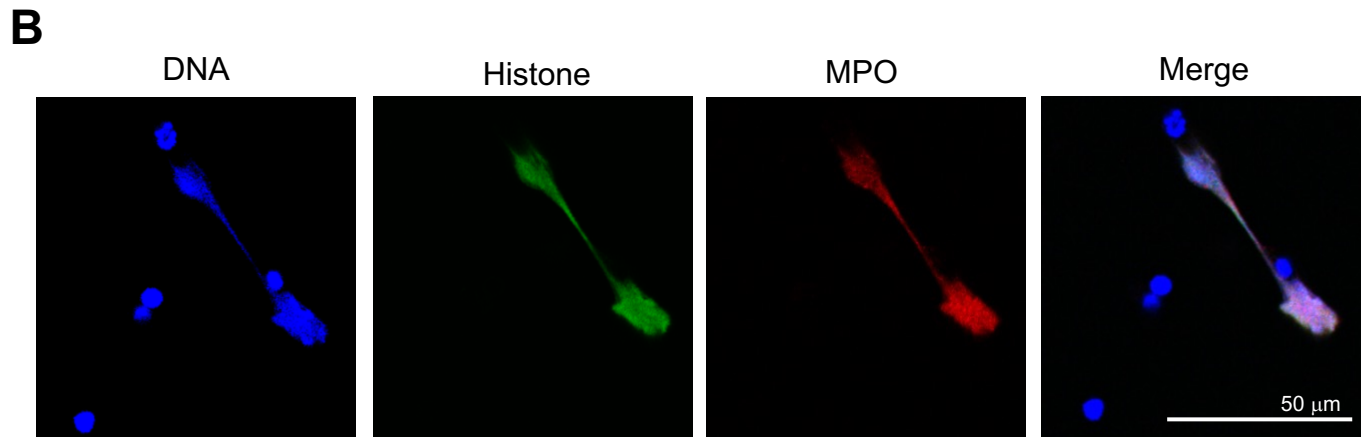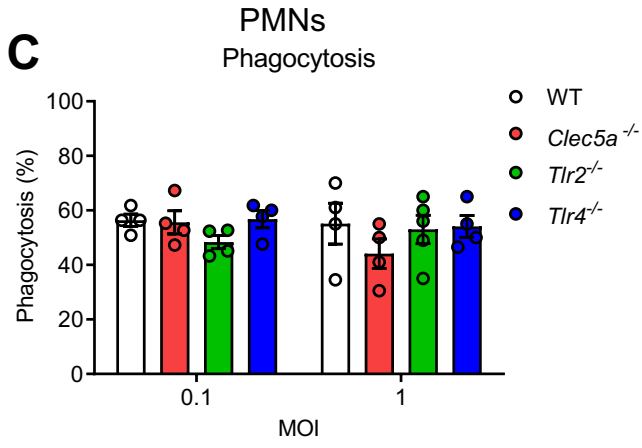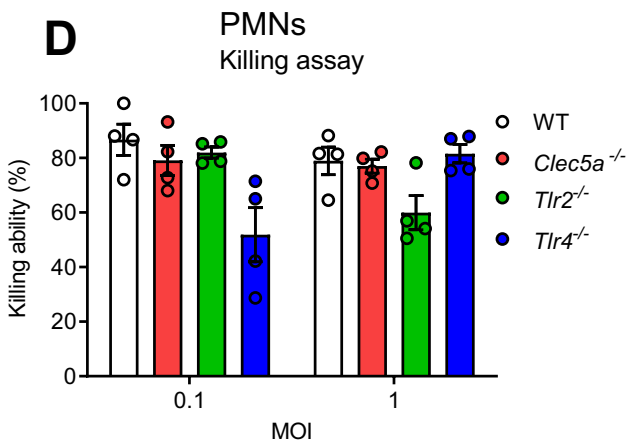

Figure S2.

Short exposure of Caspase1 in Fig. 2C

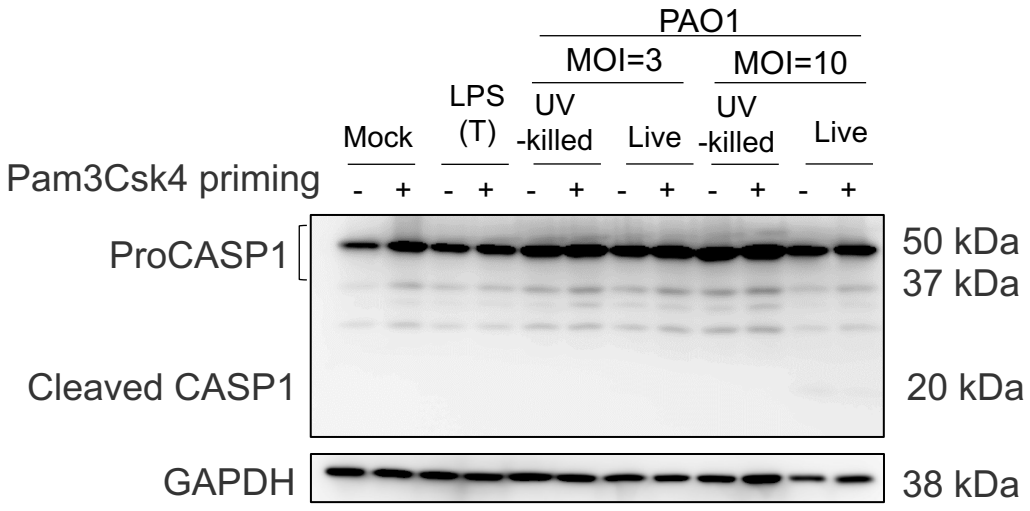

Figure S3.

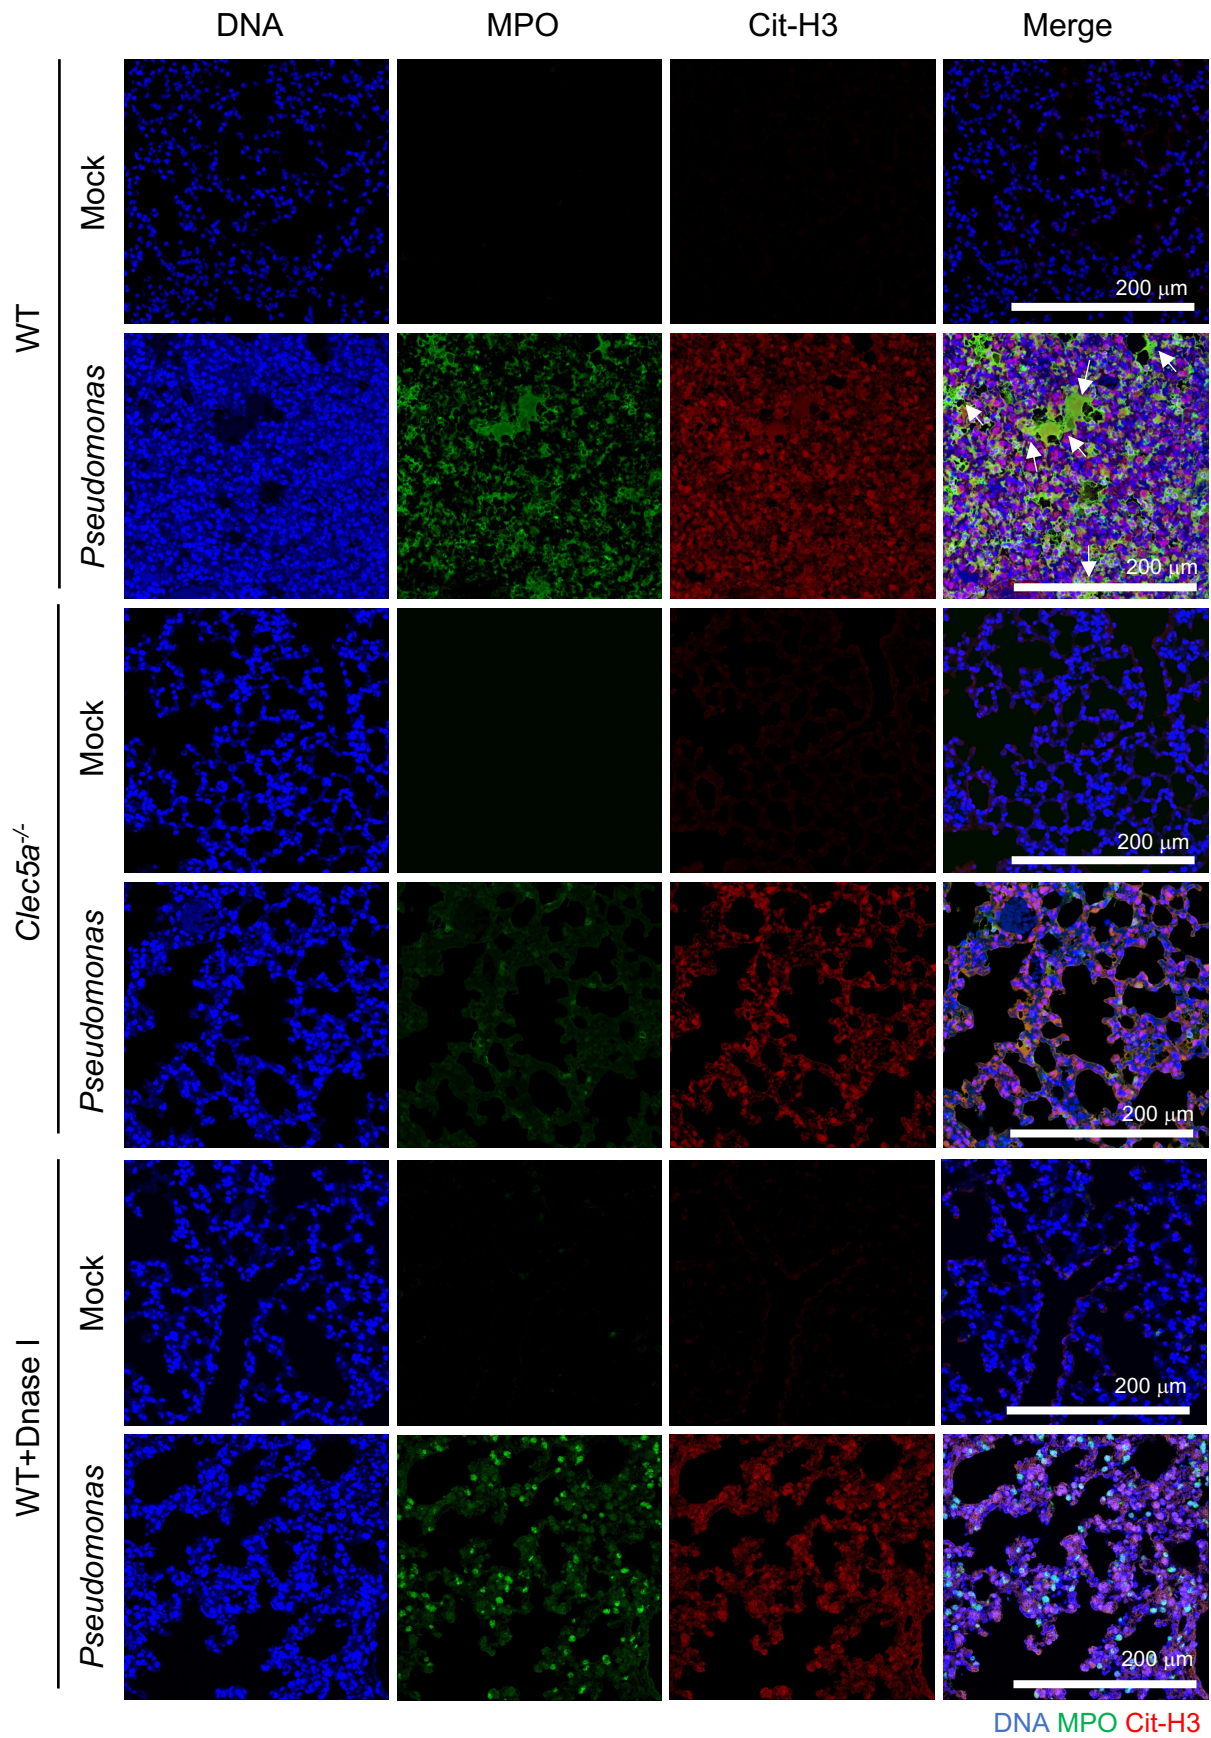

Figure S4.

**A**

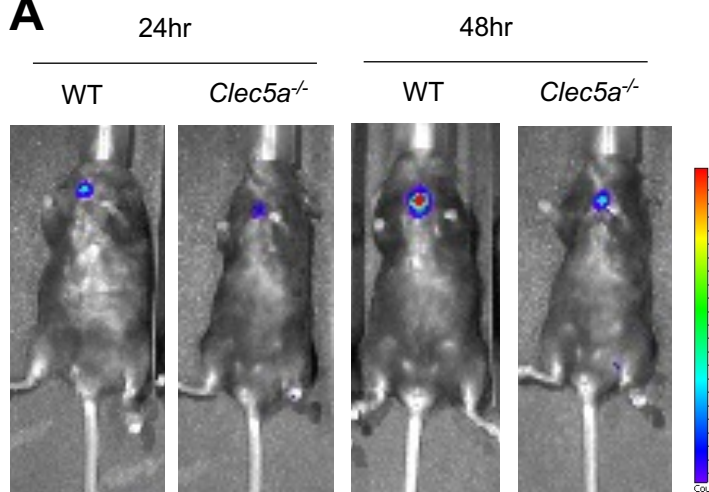

**B**

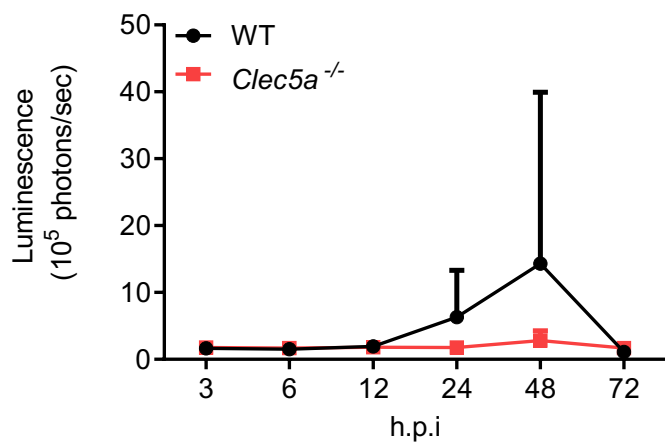

**C**

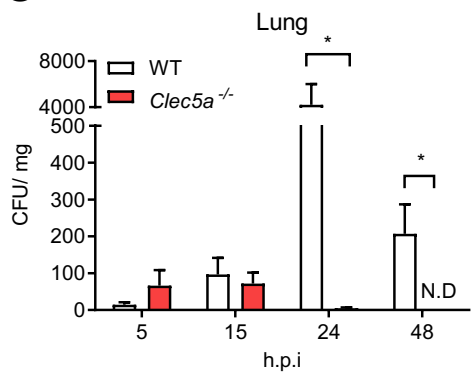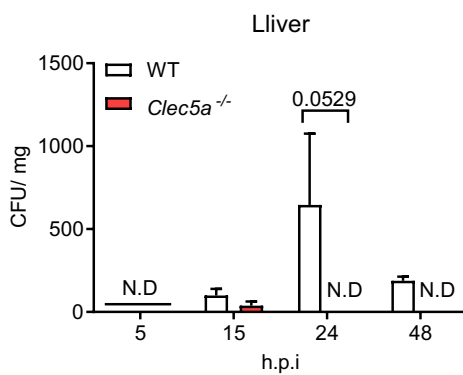

**D**

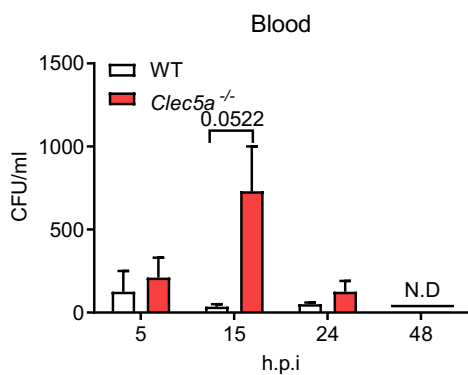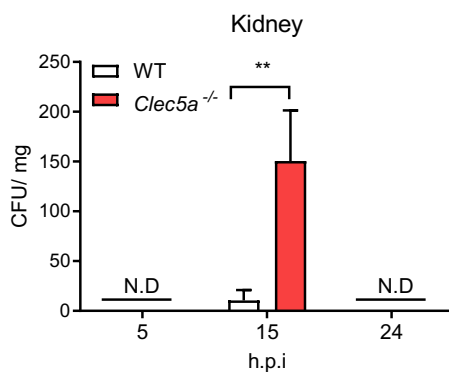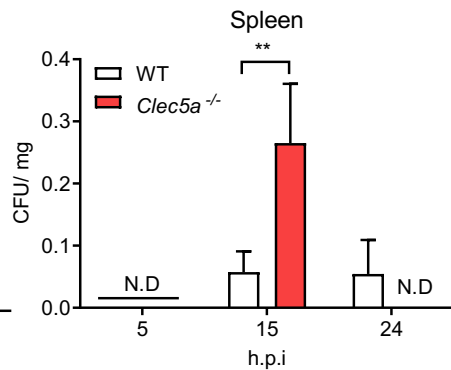

Figure S5.

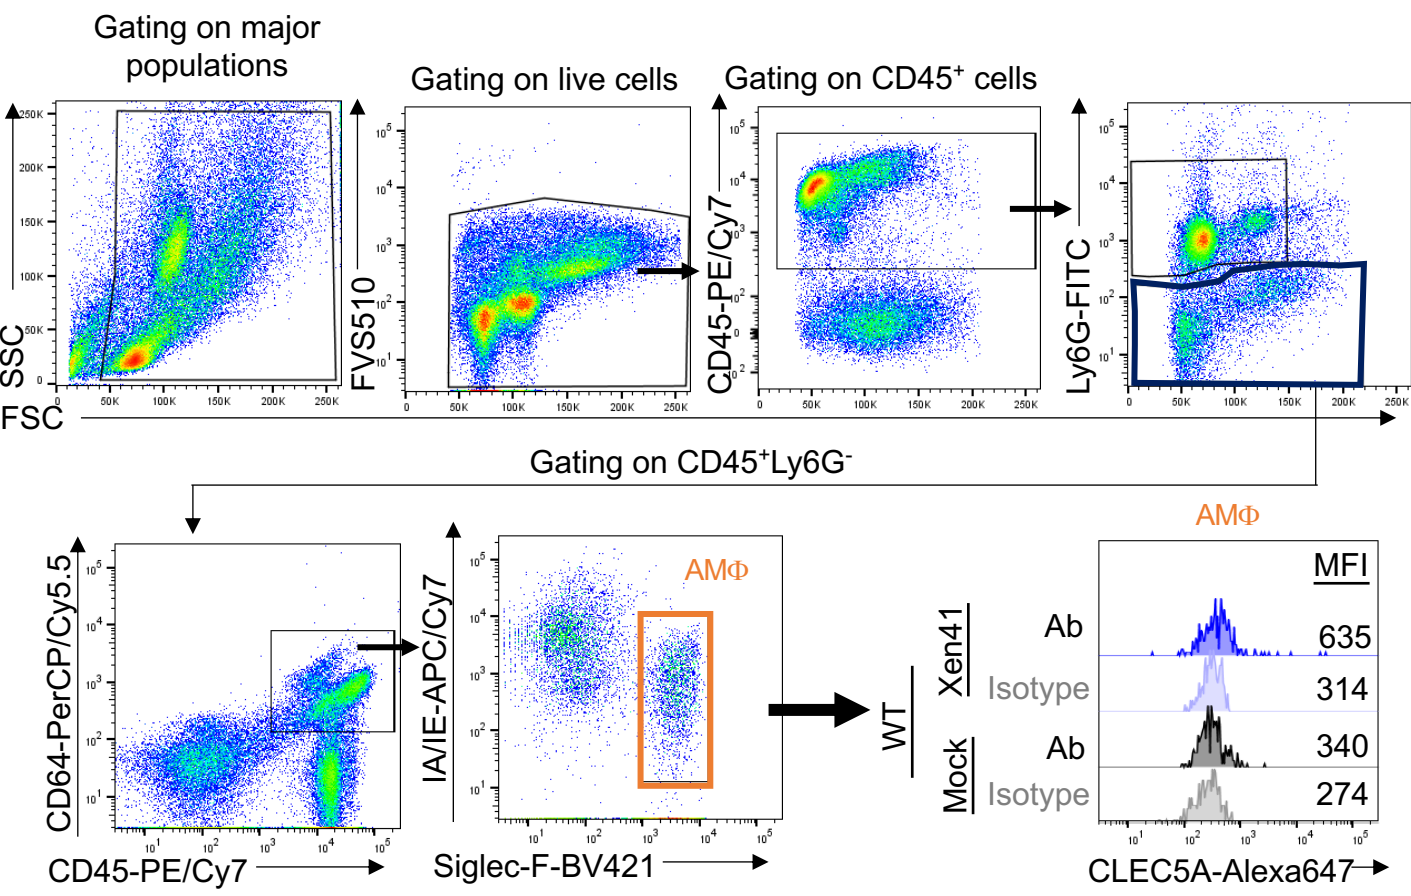

Figure S6.

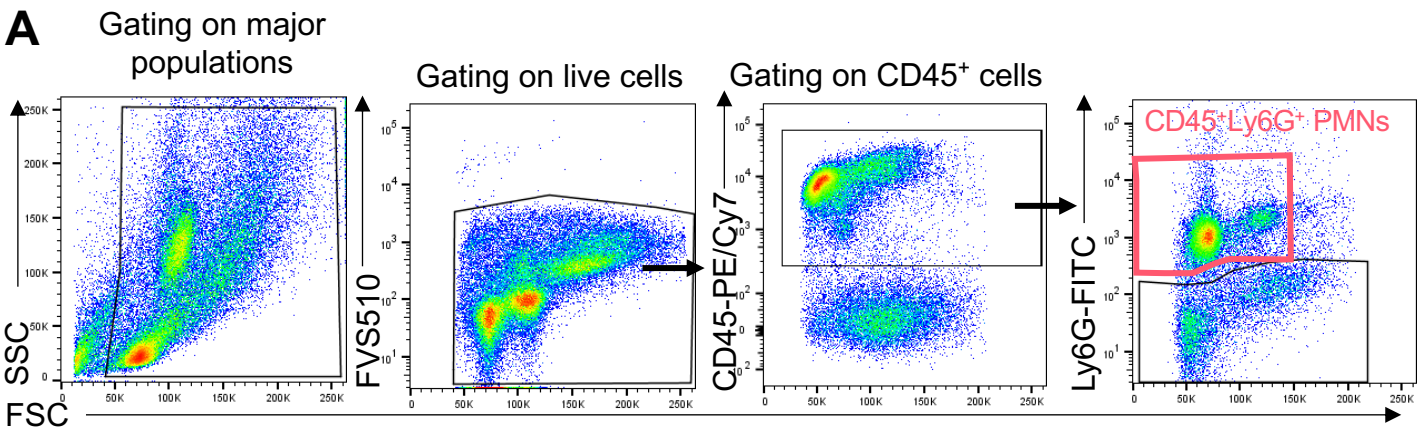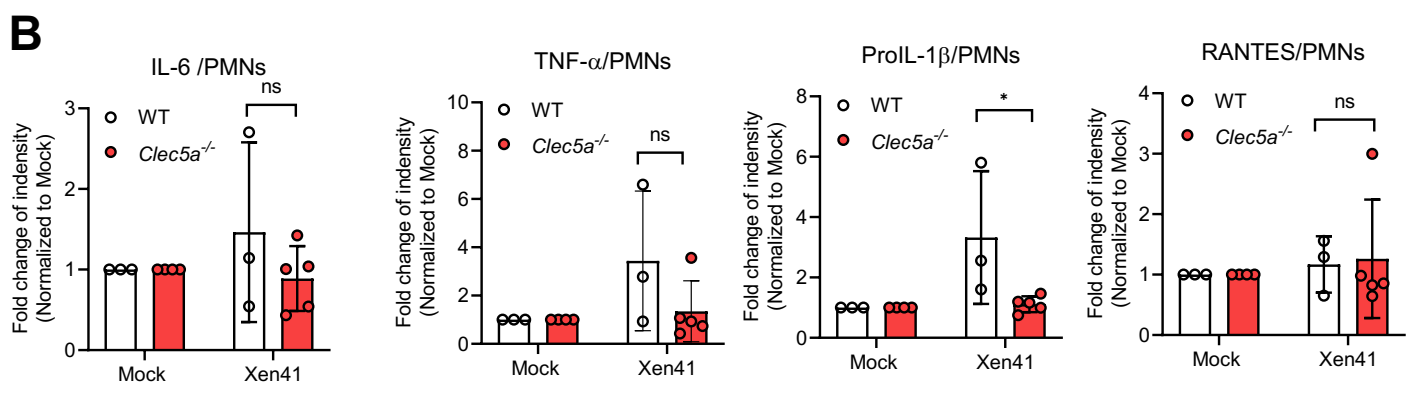

Figure S7.

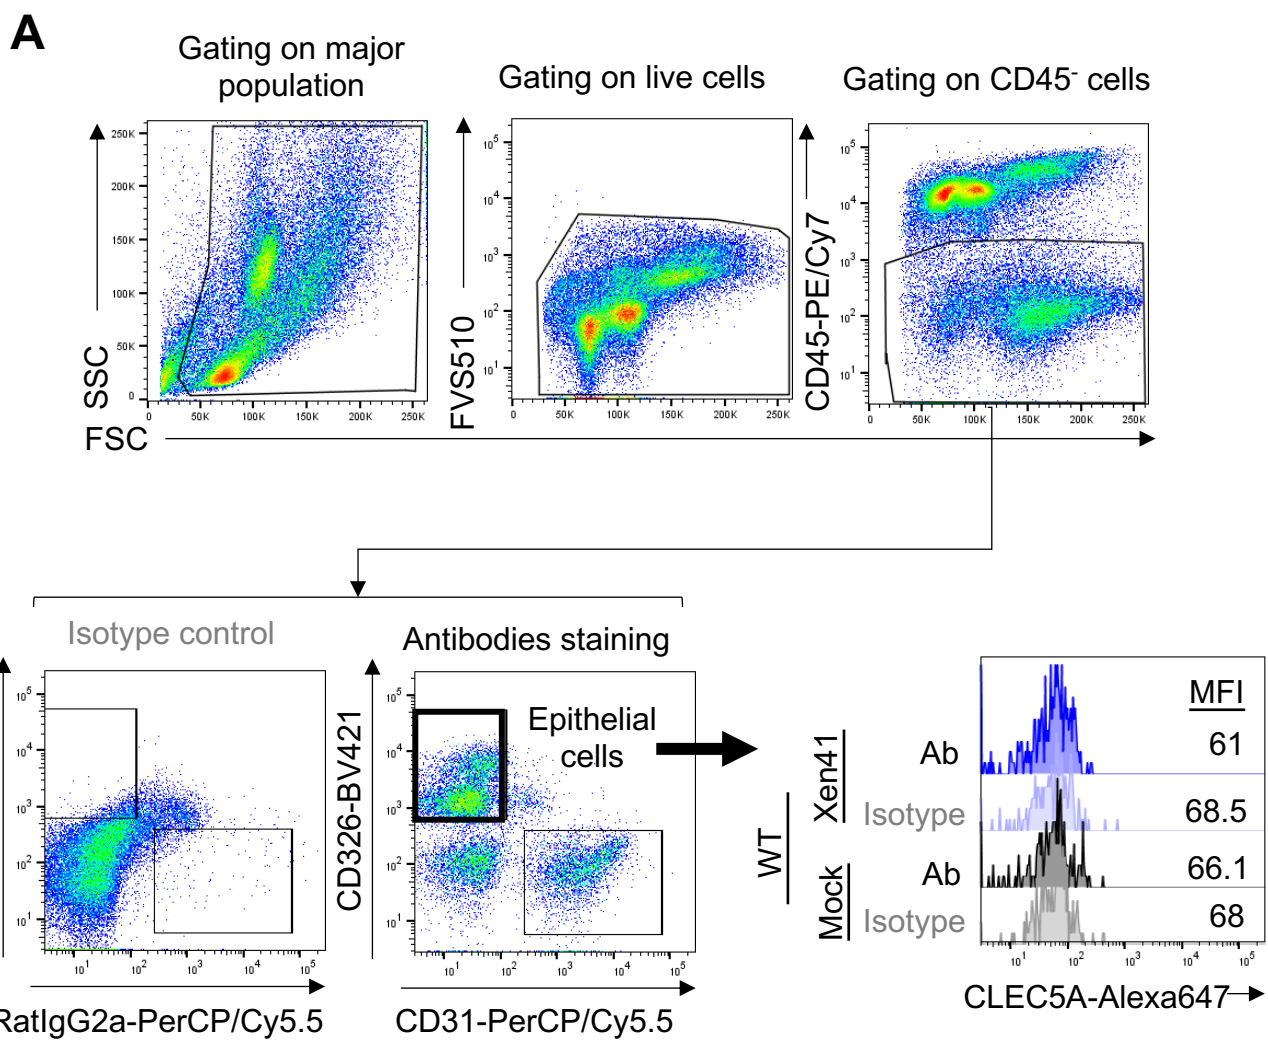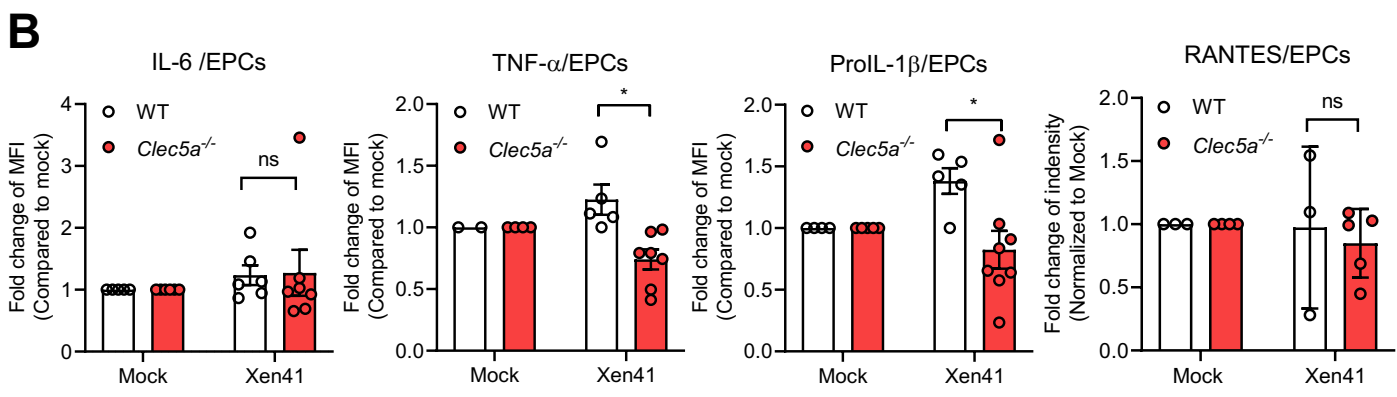

Figure S8.

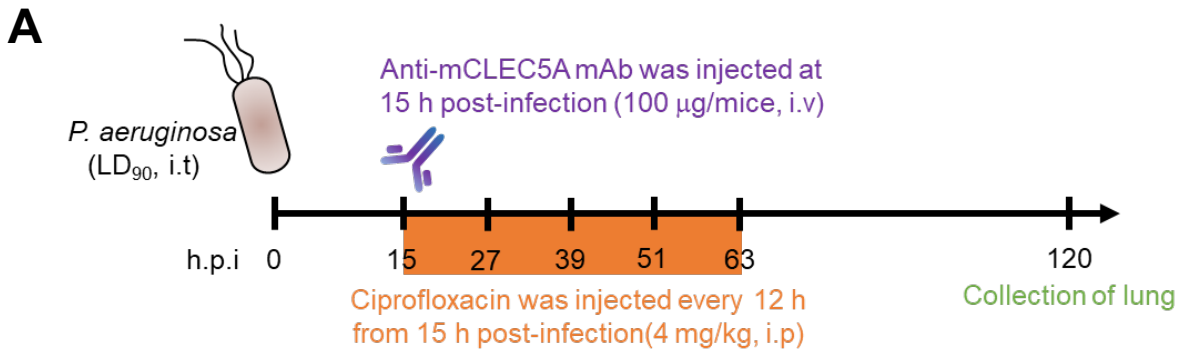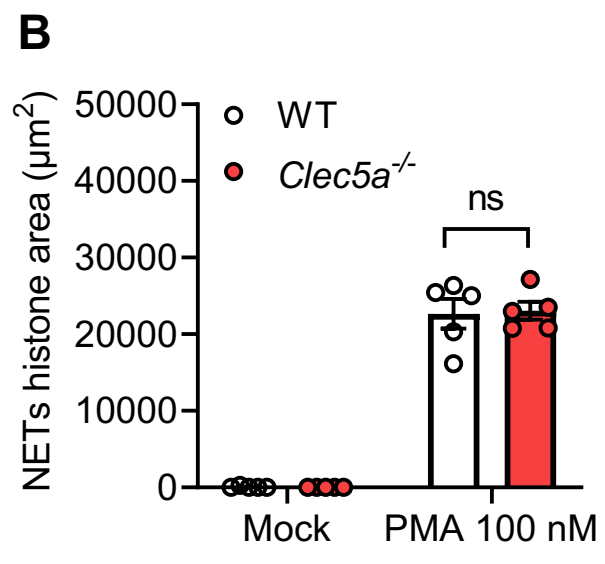



Figure S9.

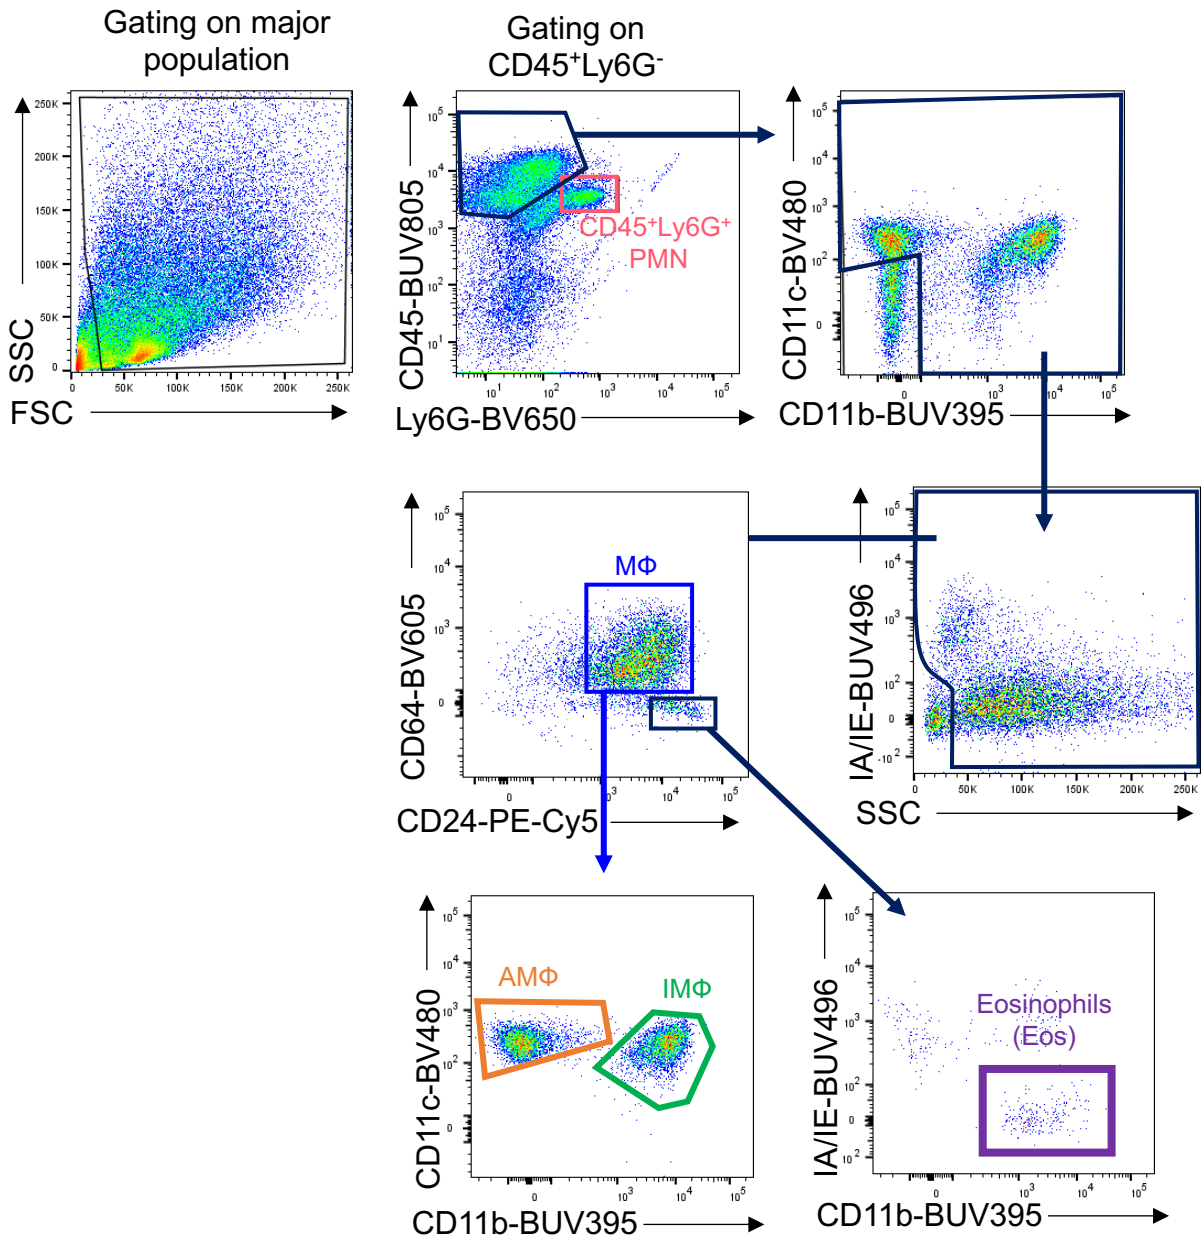

**Suppl. Table 1. Protein concentration and percentage in LPS.**

|                               | LPS (10 µg/ml) |                      |                             |
|-------------------------------|----------------|----------------------|-----------------------------|
|                               | <i>E. coli</i> | <i>K. pneumoniae</i> | <i>P. aeruginosa</i> (PAO1) |
| Protein concentration (µg/ml) | 0.65172        | 1.14952              | 0.07532                     |
| Protein percentage (%)        | 6.5172         | 11.4952              | 0.7532                      |

**Suppl. Table 2. Sequences of qPCR primers**

| Target             | Forward sequence (5' to 3') | Reverse sequence (5' to 3') |
|--------------------|-----------------------------|-----------------------------|
| mouse <i>Tnfa</i>  | GCCTCTTCTCATTCTGCTTG        | CTGATGAGAGGGAGGCCATT        |
| mouse <i>Il6</i>   | GAGGATACCACTCCCAACAGACC     | AAGTGCATCATCGTTGTTTCATAC    |
| mouse <i>Il1b</i>  | GGAGAACCAAGCAACGACAAAATA    | TGGGGAACCTCTGCAGACTCAAAC    |
| mouse <i>Cxcl1</i> | CAATGAGCTGCGCTGTCAGTG       | CTTGGGGACACCTTTTAGCATC      |
| mouse <i>Cxcl2</i> | CCAAGGGTTGACTTCAAGAAC       | AGCGAGGCACATCAGGTACG        |
| mouse <i>Cramp</i> | GCCGCTGATTCTTTTGACAT        | GCCAAGGCAGGCCTACTACT        |
| mouse <i>Gapdh</i> | GGAGAACCTGCCAAGTATG         | TGGGAGTTGCTGTTGAAG          |
